# Supplementary material for: Health disparities monitoring in the U.S.: lessons for monitoring efforts in Israel and other countries
Source: Springer Nature journal article supplement (doi:10.1186/s13584-018-0208-1), 2018-02-28
Supplement: MOESM2 [file 15497688]

**Supplemental Table 2. Healthy People 2020 Leading Health Indicators at baseline (BL) and most recent (MR) year for selected inequality parameters**

| Indicator                                                                             | Target       | Total |      | White |      | Black |      | Hispanic* |      | < High school |      | 4y college degree |      |
|---------------------------------------------------------------------------------------|--------------|-------|------|-------|------|-------|------|-----------|------|---------------|------|-------------------|------|
|                                                                                       |              | BL    | MR   | BL    | MR   | BL    | MR   | BL        | MR   | BL            | MR   | BL                | MR   |
| <b>Access to health services</b>                                                      |              |       |      |       |      |       |      |           |      |               |      |                   |      |
| % persons (<65y) with medical insurance                                               | <b>100.0</b> | 83.2  | 89.4 | 87.5  | 92.5 | 82.1  | 88.8 | 66.7      | 78.9 | 56.9          | 68.1 | 91.6              | 95.0 |
| % persons with usual primary care provider                                            | <b>83.9</b>  | 75.6  | 76.5 | 79.0  | 79.8 | 72.1  | 73.0 | 77.6      | 78.1 | 64.6          | 68.3 | 75.2              | 75.9 |
| <b>Clinical preventive services</b>                                                   |              |       |      |       |      |       |      |           |      |               |      |                   |      |
| % adults receiving colorectal cancer screening per guidelines (age adjusted, 50–75 y) | <b>70.5</b>  | 52.1  | 62.4 | 55.1  | 65.4 | 48.6  | 61.3 | 53.8      | 64.1 | 35.4          | 46.0 | 57.6              | 67.4 |
| % adults with hypertension with controlled blood pressure (age-adjusted, %, ≥18y)     | <b>61.2</b>  | 43.7  | 50.3 | 46.5  | 54.8 | 41.2  | 43.1 | 31.8      | 40.9 | 36.5          | 50.7 | 50.2              | 53.7 |
| % persons with diagnosed diabetes whose A1c value is >9% (age-adjusted, ≥18y)         | <b>16.2</b>  | 18.0  | 20.5 | 13.1  | 14.6 | 27.3  | 25.5 | 26.0      | 26.0 | 22.5          | 23.4 | --                | 20.8 |
| % fully immunized young children (19–35 mos.)                                         | <b>80.0</b>  | 68.4  | 71.6 | 69.3  | 72.6 | 64.8  | 65.4 | 67.8      | 74.3 | 63.4          | 68.0 | 74.7              | 76.2 |
| <b>Environmental quality</b>                                                          |              |       |      |       |      |       |      |           |      |               |      |                   |      |
| % children exposed to secondhand smoke (nonsmokers, 3–11y)                            | <b>47.0</b>  | 52.2  | 41.3 | 55.1  | 39.4 | 67.4  | 67.9 | 30.8      | 29.1 | --            | --   | --                | --   |
| <b>Injury &amp; violence</b>                                                          |              |       |      |       |      |       |      |           |      |               |      |                   |      |
| Injury deaths (age-adjusted, per 100,000 population)                                  | <b>53.7</b>  | 59.7  | 60.1 | 62.2  | 66.5 | 67.0  | 60.7 | 61.7      | 63.7 | --            | --   | --                | --   |
| Homicides (age adjusted, per 100,000 population)                                      | <b>5.5</b>   | 6.1   | 5.1  | 2.8   | 2.4  | 21.9  | 18.2 | 6.8       | 4.5  | --            | --   | --                | --   |
| <b>Maternal, infant &amp; child health</b>                                            |              |       |      |       |      |       |      |           |      |               |      |                   |      |
| Infant deaths (per 1,000 live births, <1y)                                            | <b>6.0</b>   | 6.7   | 6.0  | 5.6   | 5.1  | 13.4  | 11.1 | 5.4       | 5.0  | --            | --   | --                | --   |

| Indicator                                                                                           | Target      | Total |      | White |      | Black |      | Hispanic* |      | < High school |      | 4y college degree |      |
|-----------------------------------------------------------------------------------------------------|-------------|-------|------|-------|------|-------|------|-----------|------|---------------|------|-------------------|------|
|                                                                                                     |             | BL    | MR   | BL    | MR   | BL    | MR   | BL        | MR   | BL            | MR   | BL                | MR   |
| Total preterm live births (percent, <37 wk gestation)                                               | <b>11.4</b> | 12.7  | 11.4 | 11.5  | 10.2 | 18.3  | 16.3 | 12.3      | 11.3 | --            | --   | --                | --   |
| <b>Mental health</b>                                                                                |             |       |      |       |      |       |      |           |      |               |      |                   |      |
| Suicide (age adjusted, per 100,000 population)                                                      | <b>10.2</b> | 11.3  | 13.0 | 13.7  | 16.4 | 5.1   | 5.7  | 12.1      | 14.1 | --            | --   | --                | --   |
| % adolescents with major depressive episodes (12–17y)                                               | <b>7.5</b>  | 8.3   | 11.4 | 8.8   | 12.0 | 7.1   | 9.1  | 8.5       | 11.5 | --            | --   | --                | --   |
| <b>Nutrition, physical activity &amp; obesity</b>                                                   |             |       |      |       |      |       |      |           |      |               |      |                   |      |
| % adults meeting aerobic physical activity and muscle strengthening guidelines (age adjusted, ≥18y) | <b>20.1</b> | 18.2  | 21.4 | 20.7  | 23.3 | 14.8  | 19.7 | 11.3      | 16.6 | 5.2           | 7.9  | 25.5              | 29.3 |
| % obesity among adults (age adjusted, 20+ y)                                                        | <b>30.5</b> | 33.9  | 37.7 | 32.7  | 36.4 | 44.6  | 48.4 | 36.8      | 46.4 | 37.7          | 42.4 | 25.4              | 28.4 |
| % obesity among children and adolescents (2–17y)                                                    | <b>14.5</b> | 16.1  | 17.2 | 14.0  | 15.3 | 20.6  | 18.8 | 21.7      | 21.8 | --            | --   | --                | --   |
| Mean daily intake of total vegetables (age adjusted, cup equivalents/1,000 kcal, 2+ y)              | <b>1.16</b> | 0.76  | 0.77 | 0.75  | 0.77 | 0.68  | 0.66 | 0.78      | 0.79 | 0.81          | 0.81 | 0.94              | 1.00 |
| <b>Oral health</b>                                                                                  |             |       |      |       |      |       |      |           |      |               |      |                   |      |
| % persons who visited the dentist in the past year (age adjusted, 2+ y)                             | <b>49.0</b> | 44.5  | 42.1 | 50.7  | 47.8 | 31.1  | 30.3 | 29.2      | 29.8 | 19.7          | 18.2 | --                | --   |
| <b>Reproductive &amp; sexual health</b>                                                             |             |       |      |       |      |       |      |           |      |               |      |                   |      |
| % sexually active females receiving reproductive health services in the past 12 mos (15–44 y)       | <b>86.5</b> | 78.6  | 77.3 | 79.8  | 76.1 | 83.8  | 84.8 | 72.1      | 77.5 | 66.5          | 69.8 | 81.2              | 81.2 |
| % HIV-positive persons with knowledge of serostatus (13+ y)                                         | <b>90.0</b> | 80.9  | 87.0 | 83.7  | 89.2 | 79.9  | 86.7 | 79.3      | 84.7 | --            | --   | --                | --   |
| <b>Social determinants</b>                                                                          |             |       |      |       |      |       |      |           |      |               |      |                   |      |
| % students awarded a high school diploma 4 y after starting 9th grade                               | <b>87.0</b> | 79.0  | 82.0 | 84.0  | 87.0 | 67.0  | 72.0 | 71.0      | 76.0 | --            | --   | --                | --   |

| Indicator                                                              | Target      | Total |      | White |      | Black |      | Hispanic* |      | < High school |      | 4y college degree |      |
|------------------------------------------------------------------------|-------------|-------|------|-------|------|-------|------|-----------|------|---------------|------|-------------------|------|
|                                                                        |             | BL    | MR   | BL    | MR   | BL    | MR   | BL        | MR   | BL            | MR   | BL                | MR   |
| <b>Substance abuse</b>                                                 |             |       |      |       |      |       |      |           |      |               |      |                   |      |
| % adolescents using alcohol or illicit drugs in past 30 days (12–17 y) | <b>16.6</b> | 18.4  | 16.0 | 20.0  | 16.8 | 14.5  | 14.9 | 18.5      | 16.5 | --            | --   | --                | --   |
| % adults binge drinking in past 30 days (18+ y)                        | <b>24.4</b> | 27.1  | 27.0 | 27.9  | 27.5 | 24.9  | 25.3 | 29.7      | 29.6 | 22.0          | 23.1 | 25.6              | 26.1 |
| <b>Tobacco</b>                                                         |             |       |      |       |      |       |      |           |      |               |      |                   |      |
| % adult cigarette smoking (age adjusted 18+ y)                         | <b>12.0</b> | 20.6  | 15.3 | 22.6  | 17.4 | 20.7  | 16.6 | 21.6      | 16.5 | 29.8          | 25.6 | 10.2              | 7.3  |
| % adolescent cigarette smoking in past month (grades 9–12)             | <b>16.0</b> | 19.5  | 10.8 | 22.5  | 12.4 | 9.5   | 6.5  | 18.0      | 9.2  | --            | --   | --                | --   |

Source: Healthy People 2020 Topics and Objectives (<https://www.healthypeople.gov/2020/topics-objectives>)

\*For some indicators, only data for Mexican Americans was available.

-- data not provided on HP2020 website.
